# Supplementary material for: Vascular endothelial growth factor A amplification in colorectal cancer is associated with reduced M1 and M2 macrophages and diminished PD-1-expressing lymphocytes
Source: PLoS One. 2017 Apr 12;12(4):e0175563. doi: 10.1371/journal.pone.0175563 (PMC5389821; doi:10.1371/journal.pone.0175563)
Supplement: S2 Table — (XLSX) [file pone.0175563.s002.xlsx]

## Sheet: Sheet1
Supplementary Table 1: Immunohistochemical analysis CD68, CD163, PD-1 and PD-L1 in the cohort.
	CD68 staining						CD163 staining
VEGFA status	Low	Moderate	High	p-value		VEGFA status	Low	Moderate	High	p-value
Diploid	3	10	6	0.0139		Diploid	14	3	2	0.218
Polysomic	3	2	1			Polysomic	6	0	0
Amplified	10	1	2			Amplified	13	0	0
Tumor grade	Low	Moderate	High	p-value		Tumor grade	Low	Moderate	High	p-value
2	15	11	3	0.002		2	28	1	0	<0.0001
3	1	2	6			3	2	5	2
	PD-1 tumoral staining						PD-1 stromal staining
VEGFA status	Negative	Low	High	p-value		VEGFA status	Negative	Low	High	p-value
Diploid	4	8	6	0.0188		Diploid	3	6	9	0.3868
Polysomic	5	1	0			Polysomic	0	4	2
Amplified	9	1	2			Amplified	1	3	8
Tumor grade	Negative	Low	High	p-value		Tumor grade	Negative	Low	High	p-value
2	16	7	6	0.4345		2	3	10	16	0.839
3	2	3	2			3	1	3	3
	PD-L1 tumoral staining						PD-L1 stromal staining
VEGFA status	Negative	Low	High	p-value		VEGFA status	Negative	Low	High	p-value
Diploid	10	4	5	0.407		Diploid	0	2	17	0.0079
Polysomic	5	1	0			Polysomic	1	3	1
Amplified	10	2	1			Amplified	1	7	5
Tumor grade	Negative	Low	High	p-value		Tumor grade	Negative	Low	High	p-value
2	22	5	2	0.0173		2	2	10	16	0.4743
3	3	2	4			3	0	2	7
